# Supplementary material for: Effect of Modulated Electromyostimulation on the Motor System of Elderly Neurological Patients. Pilot Study of Russian Currents Also Known as Kotz Currents
Source: Front Physiol. 2022 Jul 18;13:921434. doi: 10.3389/fphys.2022.921434 (PMC9339608; doi:10.3389/fphys.2022.921434)
Supplement: Supplementary file 1 [file Table1.DOCX]

Supplementary Material

Effect of modulated electromyostimulation (Russian currents) on the motor sphere of elderly neurological patients

Liubov Amirova*†, Maria Avdeeva†2, Nikita Shishkin1, Anna Gudkova2, Alla Guekht2, Elena Tomilovskaya 1

1Laboratory of Gravitational Physiology of Sensorimotor System, Institute of Biomedical Problems of Russian Academy of Sciences, Moscow, Russia

2Consultative and Diagnostic Department, Solovyov Scientific and Practical Psychoneurological Center of the Moscow Department of Health, Moscow, Russia

**Table I.** Data from patients who took part in the survey

| Subgroups | Patient No. | Full age | Height, cm | Weight, kg | MMSE cognitive assessment (max. 30 points) |
| --- | --- | --- | --- | --- | --- |
| EMS | 1 | 65 | 162 | 77,8 | 29 |
| EMS | 2 | 69 | 167 | 83,7 | 29 |
| EMS | 3 | 76 | 148 | 63,6 | 28 |
| EMS | 4 | 64 | 170 | 95,2 | 29 |
| EMS | 5 | 79 | 160 | 80 | 29 |
| EMS | 6 | 74 | 163 | 61,6 | 28 |
| EMS | 7 | 80 | 168 | 66,8 | 28 |
| EMS | 8 | 74 | 165 | 76 | 28 |
| EMS | 9 | 80 | 169 | 72,4 | 25 |
| EMS | 10 | 81 | 153 | 76,1 | 27 |
| EMS | 11 | 62 | 175 | 60,2 | 30 |
| ***Average*** | | ***73,1*** | ***163,6*** | ***73,9*** | ***28,2*** |
| ***Standard deviation*** | | ***7,0*** | ***7,8*** | ***10,5*** | ***1,3*** |
| control | 12 | 64 | 149 | 62,9 | 28 |
| control | 13 | 64 | 156 | 84,6 | 29 |
| control | 14 | 75 | 149 | 42,6 | 26 |
| control | 15 | 73 | 156 | 75 | 26 |
| control | 16 | 82 | 160 | 72,5 | 26 |
| control | 17 | 80 | 160 | 75,4 | 27 |
| control | 18 | 80 | 150 | 79 | 26 |
| control | 19 | 72 | 152 | 77 | 28 |
| ***Average*** | | ***73,8*** | ***154,0*** | ***71,1*** | ***27,0*** |
| ***Standard deviation*** | | ***7,0*** | ***4,6*** | ***13,1*** | ***1,2*** |

**Table II.** Data on the number of EMC procedures in patients

| Patient No. | Number of EMS procedures |
| --- | --- |
| 1 | 7 |
| 2 | 7 |
| 4 | 6 |
| 5 | 9 |
| 6 | 3 |
| 7 | 8 |
| 8 | 6 |
| 9 | 3 |
| 10 | 5 |
| 11 | 8 |
| 12 | 7 |
| ***Average*** | ***6,3*** |
| ***Standard deviation*** | ***2,0*** |
| ***25% percentile*** | ***5*** |
| ***median*** | ***7*** |
| ***75% percentile*** | ***8*** |

**Figure I.** Average stimulation amplitudes. Mean±range
